1 **Multiple recent sex chromosome fusions in *Drosophila virilis* associated with elevated**  
2 **satellite DNA abundance**

3

4 **Jullien M. Flynn\*, Kevin B. Hu, Andrew G. Clark**

5

6 Department of Molecular Biology and Genetics, Cornell University, Ithaca, NY

7

8 \*Corresponding author: [jmf422@cornell.edu](mailto:jmf422@cornell.edu)

9

10 **ABSTRACT**

11

12 Repetitive satellite DNA is highly variable both within and between species, and is often located  
13 near centromeres. However, the abundance or array length of satellite DNA may be  
14 constrained or have maximum limits. *Drosophila virilis* contains among the highest relative  
15 satellite abundances, with almost half its genome composed of three related 7 bp satellites. We  
16 discovered a strain of *D. virilis* that has 15% more pericentromeric satellite DNA compared to  
17 other strains, and also underwent two independent centromere-to-centromere sex  
18 chromosome fusion events. These fusions are presumably caused by DNA breakage near the  
19 pericentromeric satellites followed by repair using similar repetitive regions of nonhomologous  
20 chromosomes. We hypothesized that excess satellite DNA might increase the risk of DNA  
21 breaks and genome instability when stressed, which would be consistent with the apparent  
22 high rate of fusions we found in this strain. To directly quantify DNA breakage levels between  
23 strains with different satellite DNA abundances, we performed the comet assay after feeding  
24 flies gemcitabine and administering low-dose gamma radiation. We found a positive correlation  
25 between the rate of DNA breakage and satellite DNA abundance. This was further supported by  
26 a significant decrease in DNA breakage in an otherwise genetically identical substrain that lost  
27 the chromosome fusion and several megabases of satellite DNA. We find that the centromere-  
28 to-centromere fusions resulted in up to a 21% nondisjunction rate between the X and Y  
29 chromosomes in males, adding a fitness cost. Finally, we propose a model consistent with our

30 data that implicates genome instability as a critical evolutionary constraint to satellite  
31 abundance.  
32

33

## 34 INTRODUCTION

35

36 Satellite DNA consists of long arrays of tandemly repeated sequences, and is often located near  
37 centromeres in heterochromatin (reviewed in Thakur *et al.* 2021). Satellite DNA varies greatly in  
38 sequence and abundance within and between species (Subirana *et al.* 2015; Wei *et al.* 2018;  
39 Cechova *et al.* 2019), and this can be partially explained by high rates of copy number mutation  
40 (Flynn *et al.* 2017). Although previously assumed to be inert “junk,” recent work has shown that  
41 satellite DNA is involved in essential processes in the cell, thus variation in it may be biologically  
42 important (Jagannathan *et al.* 2018; Mills *et al.* 2019). Although satellite DNA differences  
43 between some species have been linked to reproductive incompatibilities (Ferree and Barbash  
44 2009; Jagannathan and Yamashita 2021), the biological implications of intraspecies abundance  
45 variation has not been explored. Satellite DNA can vary in abundance by several megabases  
46 among individuals of the same species, including in flies and humans (Miga *et al.* 2014; Wei *et*  
47 *al.* 2014; Flynn *et al.* 2020). Satellite DNA appears to be constrained by maximum limits, with no  
48 species studied so far having more than about half of their genome made up of satellite DNA  
49 (Gall and Atherton 1974a; Fry and Salser 1977; Petitpierre *et al.* 1995). The genomic abundance  
50 of transposable elements (TEs), the other highly pervasive type of repetitive DNA, seems to be  
51 less constrained than satellite DNA with many genomes over 50% and some containing up to  
52 85% TE content (Anderson *et al.* 2019). The nature of satellite DNA with long tandem arrays of  
53 the same sequence, may impose instability that prevents it from expanding beyond a threshold,  
54 compared to more diverse sequences interspersed in the genome.

55

56 *Drosophila virilis* is an excellent model for studying satellite DNA variation. *D. virilis* has the  
57 highest relative abundance of simple satellite DNA (defined as satellites with unit length  $\leq 20$   
58 bp) compared to any other studied species. Three 7 bp satellites, AACTAC, AACTAT, and  
59 AAATTAC take up over 40% of the genome in *D. virilis*, and they form arrays tens of megabases  
60 long in the pericentromeric region (Gall *et al.* 1971; Gall and Atherton 1974; Flynn *et al.* 2020).  
61 The extremely high relative abundance of satellite DNA in *D. virilis* makes it an ideal system in  
62 which to ask whether there are constraints or maximum limits on satellite abundance. One

63 strain in particular, vir00 (15010-1051.00), contains 15% more pericentromeric satellite DNA  
64 compared to other *D. virilis* strains (Flynn *et al.* 2020 Figure 4B). In past modeling efforts,  
65 satellite DNA arrays have been proposed to be weakly deleterious until they reach a maximum  
66 length beyond which they are not tolerated by selection (Charlesworth *et al.* 1986). Slow DNA  
67 replication or development time have been suggested as mechanisms to enforce strong  
68 negative selection against long satellite arrays, however empirical evidence for this has been  
69 limited (but see Bilinski *et al.* 2018). Here, we propose genome instability as a constraint on  
70 excessively long or abundant satellite DNA arrays.

71  
72 Genome instability is characterized by DNA damage that often results in large-scale mutations  
73 or rearrangements, and is a fundamental driver of karyotype evolution, chromosomal  
74 disorders, and cancer rearrangements (Black and Giunta 2018; Mayrose and Lysak 2021). The  
75 first step is spontaneous DNA damage such as double-stranded DNA breaks, one of the most  
76 dire events to occur in a cell (Featherstone and Jackson 1999). Even if DNA breaks are repaired,  
77 they often result in large-scale genome rearrangements. Most DNA breaks leading to  
78 rearrangements occur near the centromere and within or near satellite DNA, including in  
79 human genomes (Black and Giunta 2018; Balzano *et al.* 2020). This may be due to intrinsic  
80 instability of satellite DNA arrays caused by replication stress of polymerases progressing  
81 through highly repetitive sequences, or the formation of unstable DNA topology (Barra and  
82 Fachinetti 2018). Robertsonian translocations, one of the most common rearrangements in  
83 medical genetics and evolution, occur when there are breaks near the centromere of  
84 acrocentric chromosomes and when they are repaired they are fused to each other (Mayrose  
85 and Lysak 2021). Robertsonian translocations are associated with multiple miscarriages in  
86 humans and aneuploidy disorders like Patau and Down syndromes (Braekeleer and Dao 1990),  
87 with increased rates of aneuploidy driven by increased nondisjunction of Robertsonian or fused  
88 chromosomes (Schulz *et al.* 2006). We hypothesize that variation in pericentromeric satellite  
89 DNA abundance influences the risk of genome instability events. Specifically, excess satellite  
90 DNA might increase the risk of genome instability and genome rearrangements.

91

92 Sex chromosome evolution has been studied for decades, mainly making use of sex  
93 chromosomes that have arisen in different time periods (Charlesworth and Charlesworth 2000).  
94 In *Drosophila*, when an autosome fuses to either an X or Y chromosome, a so-called neo-Y  
95 chromosome is formed. Because either the fused or unfused version of the chromosome will  
96 only be present in males and male *Drosophila* do not undergo recombination, mutations  
97 immediately begin to accumulate through Hill-Robertson interference and other linked-  
98 selection processes (Charlesworth and Charlesworth 2000). In the genus *Drosophila*, autosomes  
99 have fused to sex chromosomes multiple independent times (Nozawa *et al.* 2021): *D.*  
100 *pseudoobscura* (10 million years), *D. miranda* (1 million years; Bachtrog 2013), *D. albomicans*  
101 (0.24 million years; (Wei and Bachtrog), and *D. americana* (29 thousand years; (Vieira *et al.*  
102 2006). Neo-sex chromosomes formed by *de novo* sex chromosome fusions are rare and actually  
103 under-represented compared to autosomal fusions in *Drosophila* (Anderson *et al.* 2020), and  
104 have never been discovered at their infancy before detectable divergence has occurred. How  
105 new sex chromosome fusions become stable, and how they compete with the ancestral  
106 karyotype within a species is unknown.

107

108 Here, we describe the discovery of two independent and extremely recent sex chromosome-  
109 autosome fusions in one *D. virilis* strain, vir00. We hypothesize that this strain has been more  
110 prone to DNA instability events, possibly caused by its excessive satellite DNA abundance. After  
111 applying DNA replication and physical stressors, we measured DNA damage levels directly and  
112 demonstrate that the DNA damage response is associated with satellite abundance. We use  
113 two genetically identical strains that differ only by a chromosome fusion and satellite DNA  
114 abundance, and demonstrate that the strain with more satellite DNA has significantly increased  
115 DNA damage when stressed. Finally, we propose a model that genome instability may impose a  
116 constraint on satellite abundance, a model that is entirely consistent with our data.

117

## 118 **RESULTS**

119

### 120 **Two novel sex chromosome Robertsonian translocations in *D. virilis* strain vir00**

121

122 In summer 2019, we performed DNA fluorescence in-situ hybridization (FISH) on larval  
123 neuroblast nuclei of the vir00 strain that we had obtained several months earlier from the  
124 National Drosophila Species Stock Center. We discovered it contained a Y-autosome fusion  
125 (Figure 1A). The Y chromosome is recognizable in *D. virilis* because it has a distinct DAPI staining  
126 intensity pattern, and contains a distinct arrangement of satellite DNA (Flynn *et al.* 2020).  
127 However, all other chromosomes are difficult to distinguish in metaphase spreads, so we could  
128 not immediately determine the fusion partner. We observed that the fused chromosome  
129 contained the same centromere-proximal satellite as the Y chromosome, AAACAT. To  
130 determine if this chromosome fusion was present in other strains from similar geographical  
131 locations, we imaged larvae from strains vir08, vir86, and vir48, which were collected from  
132 different localities in California and Mexico (vir00 was collected from California). No larvae  
133 screened in these other strains contained any chromosome fusions. We designate the vir00  
134 substrain with the Y fusion as vir00-Yfus.

135  
136 In Fall 2019, we obtained a second stock of vir00 from the National Drosophila Species Stock  
137 Center. We set up single pair crosses and performed larval neuroblast squashes to karyotype  
138 multiple male progeny of each cross. Surprisingly, we found that the Y-autosome fusion was not  
139 present in any of the larvae karyotyped. However, 3/10 crosses karyotyped contained a  
140 different fusion. This new fusion contained the brightly-dapi-staining AAATTAC satellite as the  
141 centromere-proximal satellite, indicating that it is completely distinct from the Y fusion and  
142 involved different chromosomes. We hypothesized that this new fusion involved the X  
143 chromosome for several reasons; 1) based on centromere satellite identity, it had a 67%  
144 probability (Flynn *et al.* 2020); 2) it was found only in single copy in male larvae, but sometimes  
145 two copies in female larvae; 3) it was associated with observed X-Y nondisjunction events, such  
146 as the presence of an XXYY female (Figure S1). We performed single-pair crosses and screened  
147 the resulting progeny until we isolated a substrain fixed for the X fusion, and called this  
148 substrain vir00-Xfus. We maintained one of the cross descendants from the 2019 stock that did  
149 not have any evidence of the X fusion, which we designate vir00-Nofus. We inferred that both X  
150 and Y fusions likely represent canonical Robertsonian translocations, in which two acrocentric

151 chromosomes that underwent DNA breakage were fused together at the centromere during  
 152 repair.

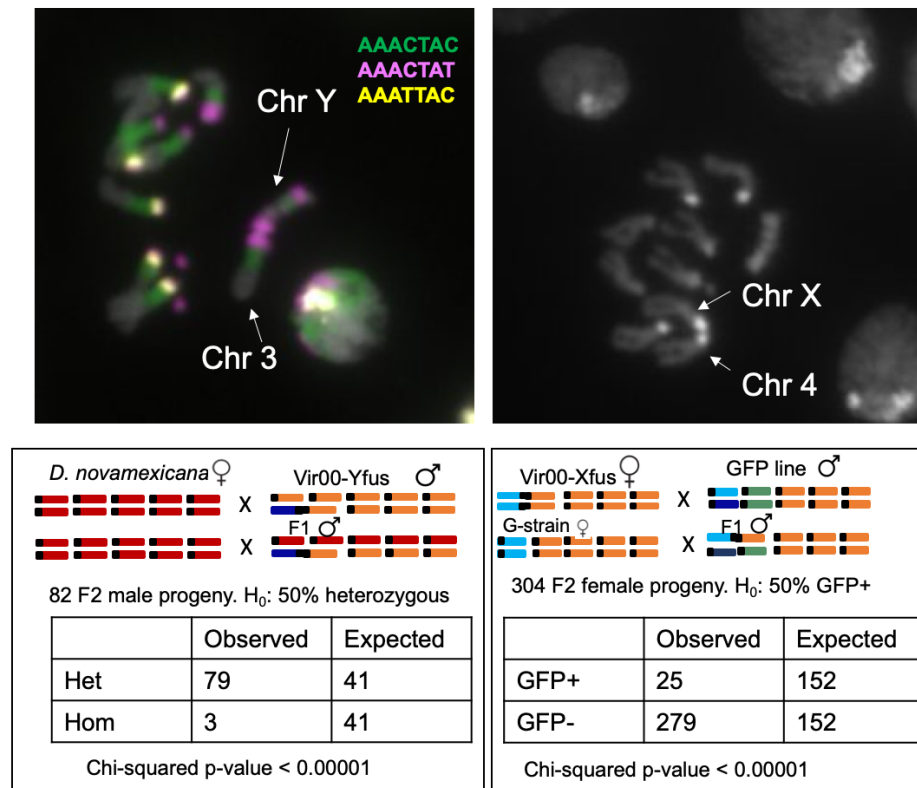

153  
 154

155 **Figure 1.** Discovery and genetic validation of two independent fusion events in vir00. A) DNA-  
 156 FISH in metaphase chromosome squashes demonstrating the Y fusion. B) DAPI staining of  
 157 metaphase chromosome squashes demonstrating the X-4 fusion. C) Genetic validation of the Y-  
 158 3 fusion and D) the X-4 fusion. Red chromosomes: *D. novamexicana*; orange: wildtype *D. virilis*  
 159 autosomes; green: autosome containing a GFP marker; light blue: X chromosome; dark blue: Y  
 160 chromosome.

161

### 162 Genetic validation revealed Y-3 and X-4 fusions

163

164 We designed two separate two-generation crossing experiments to validate the fusions  
 165 genetically and identify the autosome each sex chromosome is fused to. Both experiments  
 166 exploited autosomal markers which we could determine if they were segregating non-  
 167 independently of sex. The first experiment to validate the Y-autosome fusion used crosses  
 168 between vir00-Yfus and *D. novamexicana* and scoring of microsatellite loci on each candidate  
 169 autosome. We scored 82 F2 male progeny for the Chr3 marker, and 79/82 contained both  
 170 alleles, whereas the null hypothesis was 50% should contain both alleles (Figure 1C, Figure S2).

171 The three progeny that did not contain both alleles were determined to have nondisjunction  
172 events and did not contain the Y chromosome (Figure S3). We concluded that the Y  
173 chromosome is fused to Chr3, and that the fusion was fixed in this subline. The other markers  
174 on Chr2, Chr4, and Chr5 segregated independently of sex and acted as negative controls (Table  
175 S1). We also did a negative control with the same crossing scheme except with vir08 instead of  
176 vir00 (Chr3 chi-square  $p = 0.39$ ,  $N=22$ , Table S1).

177

178 The second experiment to validate the X-autosome fusion used crosses to *D. virilis* transgenic  
179 lines containing GFP markers on one of each of the candidate autosomes. For the crosses to  
180 Chr4-GFP (vir95), we phenotyped 304 F2 female progeny, and found that progeny containing a  
181 GFP signal were significantly depleted compared to the Mendelian expectation of 50% (Figure  
182 1D). This indicated that the X chromosome was fused to Chr4. This crossing scheme with two  
183 other candidate autosomes did not show association of GFP signal with sex (Chi-square  $p$ -value  
184  $> 0.1$ , Table S2). We also performed a negative control with the *D. virilis* genome strain instead  
185 of vir00-Xfus crossed to the Chr4-GFP line and found the GFP signal was independent of sex  
186 (Chi-square  $p$ -value = 0.92, Table S2).

187

188 We validated that vir00-Yfus and vir00-Xfus are the same genetic line and not the result of  
189 contamination from other lines either in our lab or the stock center. We made use of medium-  
190 coverage whole genome sequencing from Flynn et al. (2020) to design primers to amplify  
191 singleton insertion/deletion variants present only in vir00 (the version that was sequenced was,  
192 in hindsight, vir00-Yfus) and not in any other wildtype *D. virilis* strain present in the stock center  
193 (Table S3). We designed primers to amplify four loci on chromosomes 2, 3, 5, and 6 which  
194 contain a homozygous 12-13 bp deletion in vir00 compared to the reference and the other  
195 strains (Table S4). We found that both versions of vir00 contained the deletion at each of these  
196 loci, confirming that these substrains are indeed the same strain and not a contamination  
197 (Figure S4). Although we did the above indel experiment first, the whole genome resequencing  
198 SNP analysis (below) was also concordant with these substrains being the same genetic line.

199



200 **Satellite DNA decreased in vir00-Nofus compared to vir00-Yfus**

201

202 We used Illumina to resequence the three vir00 substrains: vir00-Yfus, vir00-Xfus, and vir00-  
203 Nofus. We then used k-Seek to quantify the satellite abundance in each substrain (Wei *et al.*  
204 2014). Assuming the most ancestral strain was vir00-Yfus, we found that satellite abundances  
205 decreased in the two derived lines vir00-Xfus and vir00-Nofus (Table S5). In vir00-Xfus, there  
206 was an 8% decrease only in the centromere proximal satellite of ChrX and Chr4 (AAATTAC).  
207 vir00-Nofus had an overall 12% loss of satellite DNA compared to vir00-Yfus (Figure 3b). vir00-  
208 Nofus had a similar 8% decrease in AAATTAC, in addition to a 10% loss in the pericentromeric  
209 satellite (AAACTAC) and a 13% loss in the centromere-proximal satellite of ChrY and Chr3  
210 (AAACTAT). These data are consistent with our interpretation that vir00-Nofus is the result of  
211 breaking apart of the fusion chromosomes, and we conclude that significant satellite DNA was  
212 lost from all three pericentromeric and centromeric satellites in vir00-Nofus.

213

214 **DNA damage levels in response to stress is related to satellite abundance in *D. virilis***

215

216 The vir00 strain, with the highest abundance of satellite DNA, contained two recent  
217 independent Robertsonian translocations. There are multiple steps required to detect a  
218 Robertsonian translocation: DNA breakage near the centromere, repair and fusion with another  
219 acrocentric chromosome, retention of a functional centromere, and intergenerational  
220 retention. To isolate the first step and the fundamental process in genome instability, we  
221 sought to measure DNA breakage directly. Since vir00-Yfus also contained the highest  
222 abundance of satellite DNA compared to the other strains, we wanted to test if variation in DNA  
223 breakage level after stress was associated with satellite DNA abundance. We therefore  
224 measured DNA damage levels in 7 different *D. virilis* strains, including vir00-Yfus and vir00-  
225 Nofus, with varying abundances of satellite DNA in response to replication stress and low-level  
226 radiation.

227

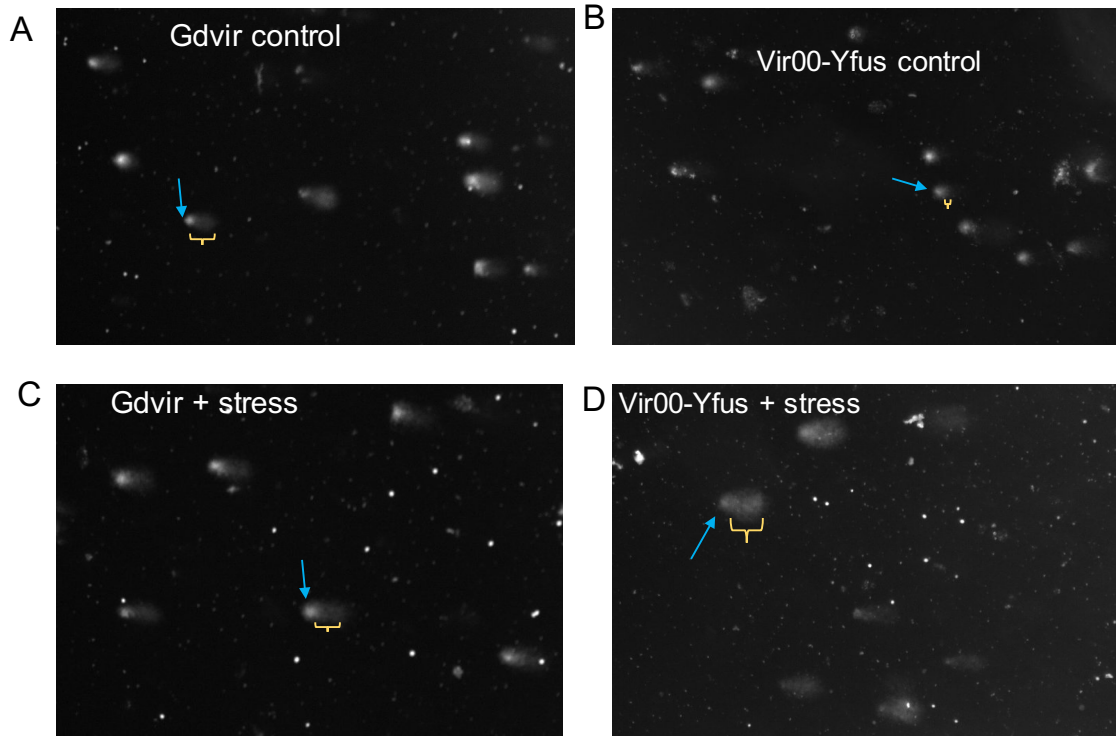

228  
229

230 **Figure 2.** Comet assay images of nuclei isolated from *D. virilis* adult testes of the genome strain  
231 vir87 (A/C) and from vir00-Yfus (B/D) with and without stress (gemcitabine + radiation). Blue  
232 arrows point to the comet head and yellow brackets indicate the comet tails. The comet head  
233 and tail distribution for GDvir are of similar size and intensity. In vir00-Yfus, the comet tail is  
234 largely diffuse and expanded in the stress conditions compared to the control. These strains  
235 represent the lowest and highest satellite DNA abundances which have the least and greatest  
236 increase in DNA damage in response to stress, respectively.  
237

238 Since spontaneous DNA breakage events are rare and we did not want to confound our data  
239 with breaks that occur as part of meiotic crossing over, we used stressors to elevate the rate of  
240 DNA damage. This would allow us to potentially detect a difference in the phenotype of interest  
241 between strains and also amplify possible types of stress imposed by excess satellite DNA  
242 content. We fed 0-1 day old adult flies the nucleoside analog gemcitabine for 8 days, which  
243 stalls replication forks and acts as a sensitizer for radiation via the Rad51 pathway  
244 (Kobashigawa *et al.* 2015). We then irradiated these sensitized flies with gamma rays at low  
245 level radiation (10 Gy). For each of seven strains tested, we included a control which was fed  
246 with the same liquid food with no gemcitabine and did not receive radiation treatment. We  
247 used the comet assay or single-cell gel electrophoresis to measure DNA damage in the male

248 germline in each line (Figure 2). We quantified comets using OpenComet software and used the  
249 olive moment measurement as the statistic representing DNA damage (Gyori *et al.* 2014) (Table  
250 S6). To detect differences in DNA damage in response to stress between strains, we took the  
251 mean difference in olive moments between the control and stress treatments (see Methods).

252  
253 The strain with the lowest satellite abundance, the genome strain, contained the lowest DNA  
254 damage response and this was significantly lower than all other strains tested (Figure 2A,C,  
255 Figure 3A). The strain with the highest satellite abundance, vir00-Yfus, had among the highest  
256 DNA damage responses (Figure 2B,D), but was not significantly different from two other strains  
257 vir8 and vir48 (Figure 3A). Like most other phenotypes, there are likely multiple genetic factors  
258 contributing to the variation we found. Ideally, to demonstrate that satellite DNA is a causal  
259 factor, we would manipulate satellite DNA abundance and test the DNA damage phenotypes,  
260 but multi-megabase long arrays of satellite DNA cannot be manipulated with traditional  
261 genome editing. However, vir00-Yfus and vir00-Nofus differ only by a chromosome fusion and  
262 12% satellite abundance. Thus, if there is a difference in DNA damage response between these  
263 substrains, it may be caused by differing satellite abundance. vir00-Nofus, which contained 12%  
264 less satellite DNA than vir00-Yfus, had a significantly reduced DNA damage response, which is  
265 concordant with our expectations that satellite DNA plays a causal role (Figure 3B).

266

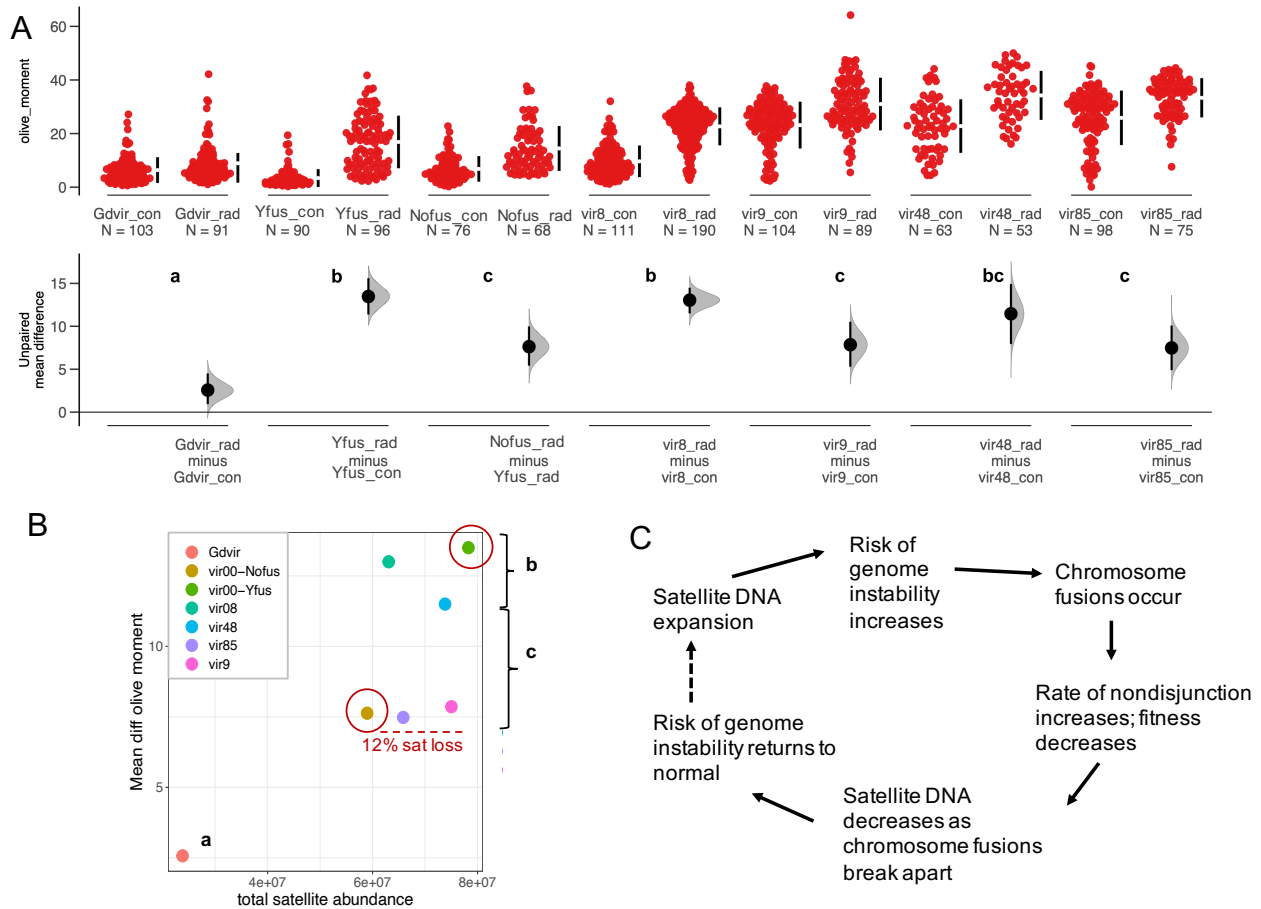

267  
268

269 **Figure 3.** Satellite DNA is associated with DNA breakage in response to stress. A) Olive moment,  
270 a statistic of the comet assay, measuring DNA damage for 7 different strains paired with a  
271 control and stress treatment. N indicates the number of nuclei analyzed for each treatment.  
272 Flies treated with gemcitabine and radiation are suffixed with “rad” and control flies are  
273 suffixed with “con”. The lower panel shows the unpaired mean difference between “rad” and  
274 “con” for each fly strain (black dot) and 95% confidence intervals (black line) produced from  
275 dabestr (5000 bootstrap method). Groups a, b, and c indicate samples with overlapping  
276 confidence intervals. B) The satellite DNA abundance of each *D. virilis* strain (x axis) and its  
277 unpaired mean difference between treatment and control (y axis). vir00-Nofus experienced a  
278 12% loss in satellite DNA compared to vir00-Yfus, which is associated with a significantly  
279 decreased DNA damage in response to stress. C) Model that is consistent with our observations  
280 and data.

281

282

### 283 Extremely minimal degradation of the neo-Y chromosome

284

285 The Y-fused version of Chr3 is expected to accumulate mutations independently of the

286 autosomal version of Chr3 over time because of the halt in recombination in male flies. This

287 would be represented in the mapping of short-read sequencing data by elevated heterozygosity  
288 on Chr3. Specifically, if the mutations arose after the fusion of Chr3 to the Y, they would not be  
289 present in any other strains of virilis, assuming no recurrent mutation. Thus, we used GATK  
290 genotyping and found heterozygous singletons unique to vir00-Yfus compared to other non-  
291 vir00 strains on each autosome (Table S3). We found that the number of heterozygous  
292 singletons was modestly but significantly enriched on Chr3 in vir00-Yfus: 2.45 SNPs/Mb more  
293 than other autosomes (permutation test,  $p < 0.001$ ). We suggest this elevated density of  
294 singleton heterozygous sites may be due to the fusion with the Y chromosome and lack of  
295 recombination over several generations. Assuming the enrichment was caused only by the Y-  
296 fusion and that the neo-Y (Chr3) evolved clonally in a single lineage, we roughly estimate the Y-  
297 3 fusion occurred 1000-2000 generations ago.

298

299 Because the X-4 fusion was segregating with the no-fusion karyotype, recombination in  
300 heterozygotes would prevent degeneration of the neo-Y version of Chr4. Furthermore, we  
301 believe the X-4 fusion occurred between 2018-2019 since it was not present in the stock we  
302 obtained in 2018. We did not observe an enrichment of heterozygous singletons on Chr4 in  
303 vir00-Xfus. However, there was still a slight enrichment on Chr3 in vir00-Xfus (1.45 SNPs/Mb,  
304 permutation test  $p = 0.031$ ), supporting our assumption that vir00-Xfus is the result of the  
305 breaking apart of the Y fusion and forming a new fusion.

306

### 307 **Nondisjunction between the X and Y chromosomes is highly elevated in chromosome fusion** 308 **lines**

309

310 Nondisjunction occurs when homologous chromosomes fail to separate at meiosis, and results  
311 in aneuploidy in the progeny. Autosomal and X chromosome aneuploidy is lethal in flies; but Y  
312 chromosome aneuploidy is viable: females that have a Y chromosome (XXY) are fertile, males  
313 with no Y chromosome (XO) are sterile, and males with two Y chromosomes (XYY) are fertile.  
314 Elevated rates of X-Y nondisjunction represent a fitness cost because zygotes with infertile or  
315 lethal karyotypes will form at increased frequency. We found some evidence of nondisjunction

316 in the vir00-Yfus genetic validation (Figure S3), and also common Y chromosome aneuploidy in  
317 the stock of vir00-Xfus (Figure S1). Since both fusions involve the sex chromosomes, we tested  
318 the rate of primary X-Y nondisjunction in males in all three versions of vir00, along with the *D.*  
319 *virilis* genome strain as a control. We first fully isolated the vir00-Nofus strain to ensure no  
320 fusion chromosomes were segregating, which even at low frequency could increase the rate of  
321 nondisjunction in the line.

322

323 We crossed individual males of each strain to genome strain females and genotyped for the  
324 presence or absence of the Y chromosome in progeny. Female progeny containing a Y  
325 chromosome indicate XY sperm from the father, and male progeny lacking a Y chromosome  
326 indicate nullisomic sperm from the father. Since nondisjunction was extremely high in vir00-  
327 Xfus, 2/7 fathers tested were of XYY karyotype, which we could infer if more than half of his  
328 female progeny contained a Y chromosome (Maggert 2014). We eliminated these fathers'  
329 progeny from the primary nondisjunction rate calculation. No fathers tested from other  
330 sublines were determined to be XYY. Males without a Y chromosome would not produce  
331 progeny. We found that vir00-Yfus had a slightly elevated nondisjunction rate of 4.5%,  
332 compared to the genome strain control of 1.2%, but it was not statistically significant with the  
333 sample sizes we used (Table 1). vir00-Xfus had an extremely high primary nondisjunction rate of  
334 21% (e.g. Figure S5), which was significantly higher than that of all other substrains ( $p < 0.004$ ,  
335 pairwise proportion test, Table 1). Surprisingly, vir00-Nofus had a significantly elevated  
336 nondisjunction rate compared to the genome strain control, at 5.7%. This was not statistically  
337 different from vir00-Yfus.

338

339  
340  
341  
342  
343

**Table 1:** Nondisjunction of the X and Y chromosomes in males is elevated in chromosome fusion lines.

| Line        | Nondisjunction rate | Fathers with nondisjunction/ total fathers | Aneuploid progeny/ total progeny | Significance group |
|-------------|---------------------|--------------------------------------------|----------------------------------|--------------------|
| GDvir       | 1.2%                | 1 / 10                                     | 3 / 248                          | a                  |
| vir00-Yfus  | 4.5%                | 4 / 7                                      | 9 / 198                          | ab                 |
| vir00-Nofus | 5.7%                | 4 / 6                                      | 11 / 192                         | b                  |
| vir00-Xfus* | 21%                 | 5 / 5                                      | 27 / 127                         | c                  |

344  
345  
346  
347  
348  
349  
350

\*only including primary nondisjunction

## Discussion

351 *D. virilis* has the highest relative satellite DNA abundance of any studied species. Is there a  
352 maximum limit of satellite DNA a genome can tolerate before there are negative  
353 consequences? We found that vir00, the strain with 15% more pericentromeric satellite DNA  
354 than other strains recently underwent two independent chromosome fusion events. vir00-Yfus  
355 has the highest satellite DNA abundance and among the highest DNA damage level in response  
356 to stress. vir00-Nofus, with 12% less satellite DNA, which was presumably lost in the breaking  
357 apart of the chromosome fusions, has significantly lower DNA damage level in response to  
358 stress. We propose a model that places a constraint on satellite DNA abundance and can  
359 explain our findings with the vir00-line (Figure 3C). If satellite DNA expands, the risk of DNA  
360 breakage and genome instability increases and chromosome fusions may occur. These  
361 chromosome fusions may increase the nondisjunction rate and make the affected line less fit.  
362 The chromosome fusions may later break apart; and as this occurs pericentromeric satellite  
363 DNA may be lost (Figure 3C). This in turn results in a decreased risk of genome instability. The

364 question of whether satellite DNA abundance influences genome instability has had  
365 considerable interest recently (Arora *et al.* 2021), however a convenient system in which to test  
366 this question has been lacking.

367

368 There are several possible mechanisms that might cause excess satellite DNA to increase the  
369 risk of DNA breakage. Satellite DNA may form complex structures, loops, or non-B DNA, and  
370 increasing the length of the arrays may make these regions more unstable in cis (Barra and  
371 Fachinetti 2018). It may be challenging for polymerases to replicate many megabases of  
372 tandem satellite sequence, and longer arrays may have a higher risk of stalling polymerases and  
373 thus DNA breaks in cis (Barra and Fachinetti 2018). Finally, increased satellite DNA may titrate  
374 away binding proteins that maintain genome stability, in trans (Francisco and Lemos 2014;  
375 Brown *et al.* 2020a; Giunta *et al.* 2021). Whether there is a maximum threshold of satellite  
376 array length or abundance, as suggested in Charlesworth *et al.* (1986), or whether risk of  
377 genome instability varies continuously with satellite abundance will require further study.

378

379 Chromosome rearrangements such as Robertsonian translocations are rare occurrences, but  
380 are commonly the cause of karyotype evolution between species (Mayrose and Lysak 2021). In  
381 humans, rearrangements resulting from breaks near the centromere are associated with  
382 miscarriages and in the case of somatic rearrangements, cancer (Barra and Fachinetti 2018).  
383 Previous studies have found repetitive element involvement in chromosome rearrangements in  
384 multiple species (Paço *et al.* 2015; Reis *et al.* 2018). However, genetic variation of repetitive  
385 DNA within species has never been associated with increased risk of genome instability. Here  
386 our data suggests, at least in *D. virilis* strain vir00, that elevated satellite DNA may play a causal  
387 role in increasing the risk of DNA breakage, which can lead to deleterious rearrangements.

388

389 We identified elevated nondisjunction rates as a cost of chromosome fusions. Surprisingly, the  
390 rate of nondisjunction was 5-fold higher in vir00-Xfus compared to vir00-Yfus. With a  
391 nondisjunction rate of 21%, a significant proportion of abnormal karyotypes will be produced,  
392 such as XO (sterile), XYY (viable and fertile), and XXY or XXYY (viable and fertile), all of which we



393 found in cytological samples. Further mating between these abnormal karyotypes will produce  
394 significant proportions of sterile or inviable karyotypes like XYYY or XXX, which will further  
395 decrease the fitness of this line. Furthermore, karyotypes with extra Y chromosomes such as  
396 XYY and XXY have been found to have decreased lifespan (Brown *et al.* 2020b). Although we did  
397 not assay the nondisjunction rate of the fused autosome, it is possible the nondisjunction rate  
398 of Chr4 is also elevated in vir00-Xfus, which would further decrease the fitness of the line  
399 because Chr4 aneuploidy is expected to be lethal (Lindsley *et al.* 1972). The extreme  
400 nondisjunction rate indicates X-Y pairing is severely disrupted due to the X-4 fusion, but only  
401 slightly if at all due to the Y-3 fusion. When the Y fusion presumably broke apart and the X  
402 fusion formed, it is possible other rearrangements on the X and/or Y occurred that disrupted  
403 pairing. Furthermore, the nondisjunction rate did not decrease to a level similar to the genome  
404 strain in vir00-Nofus. We believe this indicates a remaining rearrangement in vir00-Nofus  
405 affecting the pairing and disjunction of the X-Y. We only found a modest difference in estimated  
406 rDNA copy number between the substrains (Table S7), which has been found to mediate pairing  
407 of the X and Y (McKee and Karpen 1990). Detailed analysis of structural rearrangements in the  
408 heterochromatin will be required to determine the mechanism of the elevated nondisjunction  
409 rates.

410  
411 Our study has several limitations. First, the vir00-Nofus flies we used for resequencing and for  
412 DNA damage assays had the X-4 fusion segregating at low frequency (<15%), which was  
413 unknown to us until we were able to correct it for the nondisjunction assays. However, we  
414 believe our results hold firmly because the main comparison was with vir00-Yfus, the substrain  
415 with the most satellite DNA. For testing our hypothesis, the fusion status in the other substrains  
416 matters less than the satellite DNA abundance, which was markedly lower in the vir00-Nofus  
417 substrain we used. Furthermore, the increase in damage level between the control and stressed  
418 flies may not be directly applicable to the risk of DNA breaks and genome instability in natural  
419 conditions. Although we find a difference in the DNA damage in response to stress between  
420 vir00 substrains with different abundances of satellite DNA, their fusion status is also different.  
421 We cannot eliminate the possibility that the presence of the Y fusion itself increased the rate of

422 DNA damage instead of the abundance of satellite DNA. Finally, we cannot eliminate the  
423 possibility that satellite DNA increased in vir00-Yfus after the fusion occurred and not prior to as  
424 we suggest in our model.

425  
426 We believe the system we discovered will be useful for a variety of future studies. The vir00  
427 fusion substrains will be useful for studying centromere identity. In both the Y-3 and X-4  
428 fusions, two spherical regions of satellite DNA are present at the centromere of these fusions,  
429 representing one from each acrocentric chromosome (Figure 1). We note that the X-4 fusion in  
430 vir00 is homologous to an independent X-4 fusion in *D. americana* 29 thousand years ago, a  
431 species only 4.5 million years diverged. In the X-4 fusion of *D. americana*, there is only one  
432 discrete region of centromeric satellite (Flynn *et al.* 2020), unlike what we found here. In female  
433 meiosis where chromosomes can compete to get into the oocyte rather than the polar body,  
434 “stronger” centromeres with more satellite may have an advantage. A “supercentromere”  
435 resulting from a centromere-centromere fusion is one way to do this, and in *D. americana* the  
436 X-4 fusion has biased transmission into the egg (Stewart *et al.* 2019). Finally, since both  
437 centromere-centromere fusions had matching centromere-proximal satellites (AAACTAT for Y-3  
438 and AAATTAC for X-4), we suggest that the centromeric satellite identity is important for DNA  
439 repair for Robertsonian translocations, or for stability and retention of the centromere.

440

## 441 **METHODS**

442

443 Scripts required to reproduce the computational results are available here:

444 <https://github.com/jmf422/D-virilis-fusion-chromosomes>

445

## 446 **Neuroblast squashes and satellite DNA FISH**

447

448 We dissected brains from wandering 3<sup>rd</sup>-instar larvae and performed the fixation steps as in  
449 (Larracuenta and Ferree 2015). Specifically, we placed brains in sodium citrate solution for 6  
450 minutes before fixation. After fixation and drying of slides, we applied Vectashield dapi

451 mounting medium. We performed DNA-FISH on vir00-Yfus, which allowed us to confidently  
452 identify the Y chromosome based on its unique satellite DNA composition. We used the same  
453 fixation and staining protocol as Flynn *et al.* (2020). We imaged metaphase cells using a 100x oil  
454 objective on an Olympus fluorescent microscope and Metamorph capture system at the Cornell  
455 Imaging Facility.

456

### 457 **Y-autosome fusion validation**

458

459 We designed an experiment that would both validate the Y chromosome fusion and to  
460 distinguish which autosome is fused. We first designed primers flanking microsatellite loci on all  
461 four autosomes that met the following criteria: 1) had 100% conserved non-repetitive and  
462 unique priming sites between *D. virilis* and *D. novamexicana*; 2) amplicon length differed  
463 between the species by at least 15 bp as to be distinguished on an agarose gel; 3) locus  
464 contained a mono or tri nucleotide repeat; 4) locus length ~200 bp. We next set up a two-  
465 generation crossing scheme (Figure 1A). We crossed *D. novamexicana* virgin females with vir00-  
466 Yfus males and selected the male progeny, which we backcrossed to *D. novamexicana* virgin  
467 females. We then genotyped the male F2 progeny from this cross at the 4 sets of primers  
468 corresponding to the four non-dot autosomes (Chr2, 3, 4, 5) (Table S4). We performed single-fly  
469 DNA extraction in strip tubes with Tris-EDTA buffer and 0.2 mg/mL proteinase K. We did 12 uL  
470 standard PCR reactions (3 min at 95, 30 cycles of 30 sec 95, 30 sec 55, 50 sec 72, final extension  
471 5 min). Each primer on each PCR plate had a homozygous (*D. novamexicana*) and heterozygous  
472 (*D. novamexicana*-*D. virilis* F1 hybrid) control. We then ran the PCR product on 2.5% agarose  
473 gels. If there was indeed an autosome fused to the Y chromosome, we would expect to see  
474 100% of the male progeny being heterozygous for the *virilis* and *novamexicana* alleles (except  
475 for rare cases of non-disjunction). For the autosomes that are not fused, we would expect to  
476 see 50% of the progeny being homozygous for the *novamexicana* allele, and half heterozygous,  
477 due to Mendel's law of random segregation. We successfully validated the existence of the Y  
478 fusion, and found that it is fused to chromosome 3 (Muller D) (Table S1, Figure 1). There were 3  
479 male progeny that were homozygous for the Chr3 *novamexicana* allele. We verified that these

480 were cases of nondisjunction (opposed to the Y fusion not being fixed in this subline) by finding  
481 that the Y chromosome was absent in controlled Y chromosome PCR assays (Figure S3).

482

### 483 **Isolation of vir00-Xfus and vir00-Nofus**

484

485 The X fusion was found to be segregating with a no fusion substrain in the 2019 stock of vir00.  
486 We wanted to isolate these into two separate substrains where the karyotype is fixed. From the  
487 progeny of the three original crosses in which we found the X fusion, we made 10 single pair  
488 crosses and did neuroblast squashes of 6-8 larval progeny per cross, including both sexes. By  
489 chance, we should be able to find a cross in which the mother had two copies of the fusion and  
490 the father had a single copy – in which the derived line would be fixed for the fusion. If all  
491 progeny imaged contained the fusion (and females contained two copies of the fusion), then it  
492 is likely that this was the case. We created this line, and call it vir00-Xfus. We maintained a line  
493 isolated from the 2019 stock that had no evidence of the X fusion and called it vir00-Nofus. We  
494 later found that vir00-Nofus still had the X fusion segregating at low frequency. We isolated a  
495 fixed Nofus version in the same way as above for nondisjunction assays, because a low  
496 frequency fusion could increase the nondisjunction rate greatly.

497

### 498 **X-autosome fusion validation**

499

500 We obtained transgenic strains with GFP (or Blue) insertions which are expressed in the eye and  
501 larval brain from the National Drosophila Species Stock Center (vir95, vir121, vir117). Stern *et*  
502 *al.* (2017) found the insertion sites of these lines. We chose lines which contained the GFP  
503 marker on candidate autosomes Chr2, Chr4, and Chr5. Chr3 was not a candidate because it is  
504 fused to the Y in vir00-Yfus and contains a different centromeric satellite. Before setting up  
505 crosses, we screened 10-20 larvae of each line with a fluorescent microscope to ensure the  
506 transgene had not drifted to low frequency. Larvae containing the transgene demonstrated the  
507 GFP signal in their brain. We chose to phenotype at the larval stage since we would be crossing  
508 GFP strains to wildtype red-eyed flies and the visibility of GFP in the adult eye would be low. We

509 then designed a crossing scheme which would allow us to both validate that the X chromosome  
510 was fused and distinguish which autosome it was fused to (Figure 1B). We crossed GFP-line  
511 males to vir00-Xfus virgin females. We then selected the male F1 progeny and crossed them to  
512 virilis genome strain virgin females. We then phenotyped F2 larvae, classifying each as either  
513 GFP positive or negative. When the phenotyped flies emerged, we sexed and counted them. If  
514 the candidate autosome is fused to the X, we would expect sex to segregate with the GFP  
515 marker: all female progeny will be GFP negative, and all male progeny will be GFP positive  
516 (except for phenotyping errors or rare nondisjunction events). For all other lines, sex should not  
517 segregate with GFP status. We performed negative control crosses in which the parental cross  
518 was replaced by genome strain virgin females, to ensure the crossing scheme produced the  
519 expected results (Table S2). We found that the X chromosome is fused to Chr4 (Muller B).

520

#### 521 **Validation of the three versions of vir00 with private fixed indels**

522

523 We used GATK recommended practices to do genotyping of our low-coverage whole genome  
524 sequencing data from Flynn et al. (2020). We used vcftools to subset singletons present only in  
525 vir00, which was, in hindsight, vir00-Yfus. We then used GATK's SelectVariants to select only  
526 non-reference homozygous indels 12 bp or more with a depth of at least 10 in vir00 and at least  
527 2 in the other strains. We then manually inspected each potential candidate in IGV to ensure:  
528 no reads in other strains supported the indel, all reads in vir00 supported the indel, and there  
529 were no nearby indels in other strains. We then designed primers for the four loci (on Chr 2, 3,  
530 5, 6) that met these criteria and also had enough SNP-free sequence flanking the indel in order  
531 to design primers that would amplify a locus 100-200 bp equally in all strains. We performed  
532 PCR and gel electrophoresis (2.5% gel, 98 V, 90 min).

533

#### 534 **DNA damage assays**

535

536 We chose two stressors that would moderately increase the rate of DNA breaks and allow us to  
537 potentially detect differences between strains. Gemcitabine is a nucleoside analog that induces

538 replication stress by stalling polymerases, and also sensitizes cells to radiation via the RAD51  
539 pathway (Kobashigawa *et al.* 2015). We selected dosage and a fly-feeding regime based on  
540 (Kislukhin *et al.* 2012). Ionizing radiation has long been used to increase the rates of DNA breaks  
541 in flies for mutagenesis. We chose a dose  $\frac{1}{4}$  -  $\frac{1}{2}$  of what has been typically used in mutagenesis  
542 (Carlson and Southin 1962).

543

544 We collected male flies 0-1 days old and fed them gemcitabine (0.718 mM) mixed with liquid  
545 food in vials with 8-12 adult flies as in (Kislukhin *et al.* 2012). Liquid food consisted of 12.5g  
546 sucrose, 17.5 g dry yeast, 5 mL corn syrup, and 95 mL PBS (autoclaved for 30 min immediately  
547 after adding the yeast). Flies were fed the drug for 7-9 days before radiation. Controls were fed  
548 with the same liquid food for 7-9 days, except no gemcitabine was added. Flies were moved to  
549 fresh vials every 3-4 days. For radiation treatment, we transferred flies into 50 mL conical tubes  
550 with 5 mL agar because these tubes were compatible with the radiation source. Control flies  
551 were also transferred to new tubes. We used a J.L. Shepherd & Associates Mark I Irradiator with  
552 1,100 Ci of Cs-137, and flies were irradiated at approximately 400 rad/min for a total of 10 Gy.  
553 In one case, for the GDvir stress treatment, the radiation was not stopped on time so 4 extra Gy  
554 were applied. We believe this did not affect our results, especially because the GDvir strain had  
555 the lowest DNA damage increase with gemcitabine and radiation stress. We did comet assays  
556 to measure DNA damage (Angelis *et al.* 1999) over three different dates (Table S6), but ensured  
557 experimental conditions were practically identical each time. For some samples we had to  
558 combine results from two different dates to have enough nuclei for statistical analysis (Table  
559 S6). We dissected testes from approximately 8 flies from each treatment within one hour of  
560 radiation treatment to minimize the opportunity for breakage repair (Shetty *et al.* 2017). We  
561 then homogenized the testes tissue using a dounce, filtered the homogenate through a 40  
562 micron filter to remove debris, and centrifuged and resuspended the cells to approximately  $10^5$   
563 cells/mL.

564

565 We next performed the alkaline comet assay as directed by the Enzo comet kit (ADI-900-166),  
566 which provides higher sensitivity than the neutral comet assay (Angelis *et al.* 1999). We imaged

567 slides on a metamorph imaging system at 10x magnification using a fluorescent green filter to  
568 detect the CyGreen dye included in the comet kit. We quantified damage levels using the  
569 software OpenComet as a plugin in ImageJ (Gyori *et al.* 2014). We filtered called nuclei that  
570 were not comet shapes or contained background interference. We used the measure of “olive  
571 moment,” which is the product of the percent of DNA in the tail and distance between  
572 intensity-weighted centroids of head and tail (Gyori *et al.* 2014) as the statistic to compare  
573 between strains and treatments.

574

### 575 **Resequencing sublines to determine differences in their satellite abundance.**

576

577 Pools of 6 male flies were DNA extracted with Qiagen DNeasy blood and tissue kit. PCR-free  
578 libraries were then prepared with Illumina TruSeq PCR-free library prep. Libraries were  
579 sequenced on a NextSeq 500 single end 150 bp. We removed adapters and poly-G signal with  
580 fastp and then ran k-Seek to count satellite abundances (Wei *et al.* 2014). We used average  
581 read depth to normalize the kmer counts. We also mapped the reads to the *D. virilis* rDNA  
582 consensus sequence ([http://blogs.rochester.edu/EickbushLab/?page\\_id=602](http://blogs.rochester.edu/EickbushLab/?page_id=602)) to estimate the  
583 rDNA copy number in the three vir00 substrains as well as a vir08 as a control (Table S3, S7).

584

### 585 **Using sequencing data to estimate the age of the Y-3 fusion**

586

587 Scripts for this section are available here: [https://github.com/jmf422/D-virilis-fusion-](https://github.com/jmf422/D-virilis-fusion-chromosomes/tree/main/simulate_degradation)  
588 [chromosomes/tree/main/simulate\\_degradation](https://github.com/jmf422/D-virilis-fusion-chromosomes/tree/main/simulate_degradation). We used the sequencing data from Flynn et al.  
589 (2020) in addition to data produced here for vir00-Yfus, vir00-Xfus, and vir00-Nofus and 10  
590 other *D. virilis* strains. We mapped the data to the RS2 genome assembly using bowtie2. We  
591 then genotyped with GATK following standard procedures (McKenna *et al.* 2010). We extracted  
592 heterozygous singleton sites for vir00, and counted how many occurred on each autosome. We  
593 calculated the enrichment on Chr3 in vir00-Yfus based on the difference from the average SNP  
594 density on the other autosomes (excluding the dot chromosome Chr6). To determine whether  
595 this enrichment of SNPs was significant based on the size of the chromosome and the number

596 of mutations, we randomly permuted the total number of heterozygous singleton SNPs on all  
597 autosomes and calculated the proportion falling on Chr3, and repeated this 1000 times.

598

599 We then performed simple simulations to determine approximately how many generations of  
600 mutation accumulation without recombination or selection would result in the enrichment we  
601 observed. Since heterozygous singletons are challenging for the genotyper to call with  
602 moderate coverage sequencing data, we incorporated this into our simulation. First, we made  
603 the genome assembly diploid then used mutation-simulator (Kühl *et al.* 2020) to simulate  
604 random mutations (transition/transversion ratio 2.0) at a rate of  $2 \times 10^{-9}$  per bp per generation  
605 for 500, 1000, 2000, and 5000 generations on one copy of Chr3 only. We then simulated  
606 Illumina reads with ART (Huang *et al.* 2012) at the same depth as we have for vir00-Yfus in our  
607 real data (23 x haploid or 11.5 x diploid). We next used standard GATK genotyping and selected  
608 out heterozygous singletons on Chr3. We repeated the simulation 10 times for each number of  
609 generations to get a range of values. The empirical enrichment fell in between what we found  
610 in the simulations for 1000 and 2000 generations.

611

## 612 **Nondisjunction assays**

613

614 We crossed a single male from vir00-Yfus, vir00-Xfus, vir00-Nofus (fixed), and GDvir (control) to  
615 one or two GDvir (genome strain vir87) females. We collected the virgin progeny from each  
616 cross, extracted DNA with a squish-proteinase K prep, and genotyped with PCR and gel  
617 electrophoresis for the presence or absence of the Y chromosome in up to 16 female and 16  
618 male progeny. We amplified a locus unique to the Y chromosome (primers designed by Yasir  
619 Ahmed-Braimah for a different project, Table S4). For a subset of individuals, we also  
620 performed multiplex controls with an autosomal locus. Otherwise, we performed DNA  
621 extractions in large batches with the same proteinase K mixture to minimize the chance of DNA  
622 extraction failure. A very small quantity of DNA is required for a standard PCR with robust  
623 primers. To control for the completeness of the PCR mastermix, we included male samples in  
624 the same batch as female samples. If a male lacked a Y chromosome, we inferred the father's



625 sperm was missing the Y chromosome (nullisomic), and if a female contained a Y chromosome,  
626 we inferred the father's sperm contained both X and Y. We used R `prop.test` to evaluate  
627 whether there were any differences between nondisjunction proportions for the different  
628 strains. After finding this highly significant, we used `pairwise.prop.test` in R with Holm-  
629 Bonferroni multiple test correction to determine which pairs of substrain nondisjunction rates  
630 were significantly different from each other.

631

### 632 **Acknowledgements**

633 We thank Yasir Ahmed-Braimah for discussions and use of primers. We greatly appreciate the  
634 use of the Cs-137 irradiator from the Robert Weiss lab and to Amanda Loehr for operating the  
635 device. Asha Jain prepared sequencing libraries for this project, and Yassi Hafezi provided  
636 advice on the nondisjunction assays. We also thank members of the Clark lab for discussions  
637 and encouragement on this project.

638

### 639 **References**

640

641 Anderson S. N., M. C. Stitzer, A. B. Brohammer, P. Zhou, J. M. Noshay, *et al.*, 2019 Transposable  
642 elements contribute to dynamic genome content in maize. *Plant J.* 100: 1052–1065.

643 Anderson N. W., C. E. Hjelman, and H. Blackmon, 2020 The probability of fusions joining sex  
644 chromosomes and autosomes. *Biol. Lett.* 16: 20200648.

645 Angelis K. J., M. Dusinská, and A. R. Collins, 1999 Single cell gel electrophoresis: detection of  
646 DNA damage at different levels of sensitivity. *Electrophoresis* 20: 2133–2138.

647 Arora U. P., C. Charlebois, R. A. Lawal, and B. L. Dumont, 2021 Population and subspecies  
648 diversity at mouse centromere satellites. *BMC Genomics* 22: 279.

649 Bachtrog D., 2013 Y-chromosome evolution: emerging insights into processes of Y-chromosome

650 degeneration. *Nat. Rev. Genet.* 14: 113–124.

651 Balzano E., F. Pelliccia, and S. Giunta, 2020 Genome (in)stability at tandem repeats. *Semin. Cell*  
652 *Dev. Biol.* <https://doi.org/10.1016/j.semcdb.2020.10.003>

653 Barra V., and D. Fachinetti, 2018 The dark side of centromeres: types, causes and consequences  
654 of structural abnormalities implicating centromeric DNA. *Nat. Commun.* 9: 4340.

655 Bilinski P., P. S. Albert, J. J. Berg, J. A. Birchler, M. N. Grote, *et al.*, 2018 Parallel altitudinal clines  
656 reveal trends in adaptive evolution of genome size in *Zea mays*. *PLoS Genet.* 14: e1007162.

657 Black E. M., and S. Giunta, 2018 Repetitive Fragile Sites: Centromere Satellite DNA As a Source  
658 of Genome Instability in Human Diseases. *Genes* 9. <https://doi.org/10.3390/genes9120615>

659 Braekeleer M. D., and T.-N. Dao, 1990 Cytogenetic studies in couples experiencing repeated  
660 pregnancy losses. *Hum. Reprod.* 5: 519–528.

661 Brown E. J., A. H. Nguyen, and D. Bachtrog, 2020a The *Drosophila* Y Chromosome Affects  
662 Heterochromatin Integrity Genome-Wide. *Mol. Biol. Evol.* 37: 2808–2824.

663 Brown E. J., A. H. Nguyen, and D. Bachtrog, 2020b The Y chromosome may contribute to sex-  
664 specific ageing in *Drosophila*. *Nat Ecol Evol* 4: 853–862.

665 Carlson E. A., and J. L. Southin, 1962 Comparative mutagenesis of the dumpy locus in  
666 *Drosophila melanogaster*. I. X-ray treatment of mature sperm--frequency and distribution.  
667 *Genetics* 47: 321–336.

668 Cechova M., R. S. Harris, M. Tomaszewicz, B. Arbeituber, F. Chiaromonte, *et al.*, 2019 High  
669 satellite repeat turnover in great apes studied with short- and long-read technologies. *Mol.*  
670 *Biol. Evol.* <https://doi.org/10.1093/molbev/msz156>

671 Charlesworth B., C. H. Langley, and W. Stephan, 1986 The evolution of restricted recombination  
672 and the accumulation of repeated DNA sequences. *Genetics* 112: 947–962.

673 Charlesworth B., and D. Charlesworth, 2000 The degeneration of Y chromosomes. *Philosophical*  
674 *Transactions of the Royal Society of London. Series B: Biological Sciences* 355: 1563–1572.

675 Featherstone C., and S. P. Jackson, 1999 DNA double-strand break repair. *Curr. Biol.* 9: R759–  
676 R761.

677 Ferree P. M., and D. A. Barbash, 2009 Species-specific heterochromatin prevents mitotic  
678 chromosome segregation to cause hybrid lethality in *Drosophila*. *PLoS Biol.* 7: e1000234.

679 Flynn J. M., I. Caldas, M. E. Cristescu, and A. G. Clark, 2017 Selection Constrains High Rates of  
680 Tandem Repetitive DNA Mutation in *Daphnia pulex*. *Genetics* 207: 697–710.

681 Flynn J. M., M. Long, R. A. Wing, and A. G. Clark, 2020 Evolutionary Dynamics of Abundant 7-bp  
682 Satellites in the Genome of *Drosophila virilis*. *Mol. Biol. Evol.* 37: 1362–1375.

683 Francisco F. O., and B. Lemos, 2014 How Do Y-Chromosomes Modulate Genome-Wide  
684 Epigenetic States: Genome Folding, Chromatin Sinks, and Gene Expression. *Journal of*  
685 *Genomics* 2: 94–103.

686 Fry K., and W. Salser, 1977 Nucleotide sequences of HS-alpha satellite DNA from kangaroo rat

687 Dipodomys ordii and characterization of similar sequences in other rodents. Cell 12: 1069–  
688 1084.

689 Gall J., E. Cohen, and M. Polan, 1971 Repetitive DNA sequences in Drosophila. Chromosoma 33.  
690 <https://doi.org/10.1007/bf00284948>

691 Gall J. G., and D. D. Atherton, 1974 Satellite DNA sequences in Drosophila virilis. J. Mol. Biol. 85:  
692 633–664.

693 Giunta S., S. Hervé, R. R. White, T. Wilhelm, M. Dumont, *et al.*, 2021 CENP-A chromatin prevents  
694 replication stress at centromeres to avoid structural aneuploidy. Proc. Natl. Acad. Sci. U. S.  
695 A. 118. <https://doi.org/10.1073/pnas.2015634118>

696 Gyori B. M., G. Venkatachalam, P. S. Thiagarajan, D. Hsu, and M.-V. Clement, 2014 OpenComet:  
697 an automated tool for comet assay image analysis. Redox Biol 2: 457–465.

698 Huang W., L. Li, J. R. Myers, and G. T. Marth, 2012 ART: a next-generation sequencing read  
699 simulator. Bioinformatics 28: 593–594.

700 Jagannathan M., R. Cummings, and Y. M. Yamashita, 2018 A conserved function for  
701 pericentromeric satellite DNA. Elife 7. <https://doi.org/10.7554/eLife.34122>

702 Jagannathan M., and Y. M. Yamashita, 2021 Defective satellite DNA clustering into  
703 chromocenters underlies hybrid incompatibility in Drosophila. bioRxiv 2021.04.16.440167.

704 Kislukhin G., M. L. Murphy, M. Jafari, and A. D. Long, 2012 Chemotherapy-induced toxicity is  
705 highly heritable in Drosophila melanogaster. Pharmacogenet. Genomics 22: 285–289.

706 Kobashigawa S., K. Morikawa, H. Mori, and G. Kashino, 2015 Gemcitabine Induces  
707 Radiosensitization Through Inhibition of RAD51-dependent Repair for DNA Double-strand  
708 Breaks. *Anticancer Res.* 35: 2731–2737.

709 Köhl M. A., B. Stich, and D. C. Ries, 2020 Mutation-Simulator: Fine-grained simulation of  
710 random mutations in any genome. *Bioinformatics*.  
711 <https://doi.org/10.1093/bioinformatics/btaa716>

712 Larracunte A. M., and P. M. Ferree, 2015 Simple method for fluorescence DNA in situ  
713 hybridization to squashed chromosomes. *J. Vis. Exp.* 52288.

714 Lindsley D. L., L. Sandler, B. S. Baker, A. T. Carpenter, R. E. Denell, *et al.*, 1972 Segmental  
715 aneuploidy and the genetic gross structure of the *Drosophila* genome. *Genetics* 71: 157–  
716 184.

717 Maggert K. A., 2014 Reduced rDNA Copy Number Does Not Affect “Competitive” Chromosome  
718 Pairing in XYY Males of *Drosophila melanogaster*. *G3 Genes|Genomes|Genetics* 4: 497–  
719 507.

720 Mayrose I., and M. A. Lysak, 2021 The Evolution of Chromosome Numbers: Mechanistic Models  
721 and Experimental Approaches. *Genome Biol. Evol.* 13.  
722 <https://doi.org/10.1093/gbe/evaa220>

723 McKee B. D., and G. H. Karpen, 1990 *Drosophila* ribosomal RNA genes function as an X-Y pairing  
724 site during male meiosis. *Cell* 61: 61–72.

725 McKenna A., M. Hanna, E. Banks, A. Sivachenko, K. Cibulskis, *et al.*, 2010 The Genome Analysis  
726 Toolkit: a MapReduce framework for analyzing next-generation DNA sequencing data.  
727 *Genome Res.* 20: 1297–1303.

728 Miga K. H., Y. Newton, M. Jain, N. Altemose, H. F. Willard, *et al.*, 2014 Centromere reference  
729 models for human chromosomes X and Y satellite arrays. *Genome Res.* 24: 697–707.

730 Mills W. K., Y. C. G. Lee, A. M. Kochendoerfer, E. M. Dunleavy, and G. H. Karpen, 2019 RNA from  
731 a simple-tandem repeat is required for sperm maturation and male fertility in *Drosophila*  
732 *melanogaster*. *Elife* 8. <https://doi.org/10.7554/eLife.48940>

733 Nozawa M., Y. Minakuchi, K. Satomura, S. Kondo, A. Toyoda, *et al.*, 2021 Evolutionary  
734 trajectories of three independent neo-sex chromosomes in *Drosophila*. *Cold Spring Harbor*  
735 *Laboratory* 2021.03.11.435033.

736 Paço A., F. Adegá, N. Meštrović, M. Plohl, and R. Chaves, 2015 The puzzling character of  
737 repetitive DNA in *Phodopus* genomes (Cricetidae, Rodentia). *Chromosome Res.* 23: 427–  
738 440.

739 Petitpierre E., C. Juan, J. Pons, M. Plohl, and D. Ugarkovic, 1995 Satellite DNA and constitutive  
740 heterochromatin in tenebrionid beetles, pp. 351–362 in *Kew Chromosome Conference IV.*  
741 *London: Royal Botanic Gardens,*.

742 Reis M., C. P. Vieira, R. Lata, N. Posnien, and J. Vieira, 2018 Origin and Consequences of  
743 Chromosomal Inversions in the virilis Group of *Drosophila*. *Genome Biol. Evol.* 10: 3152–  
744 3166.

745 Schulz R., L. A. Underkoffler, J. N. Collins, and R. J. Oakey, 2006 Nondisjunction and transmission  
746 ratio distortion of Chromosome 2 in a (2.8) Robertsonian translocation mouse strain.  
747 Mamm. Genome 17: 239–247.

748 Shetty V., N. J. Shetty, S. R. Ananthanarayana, S. K. Jha, and R. C. Chaubey, 2017 Evaluation of  
749 gamma radiation-induced DNA damage in *Aedes aegypti* using the comet assay. Toxicol.  
750 Ind. Health 33: 930–937.

751 Stern D. L., J. Crocker, Y. Ding, N. Frankel, G. Kappes, *et al.*, 2017 Genetic and Transgenic  
752 Reagents for *Drosophila*

753 Stewart N. B., Y. H. Ahmed-Braimah, D. G. Cerne, and B. F. McAllister, 2019 Female meiotic  
754 drive preferentially segregates derived metacentric chromosomes in *Drosophila*. bioRxiv  
755 638684.

756 Subirana J. A., M. M. Albà, and X. Messeguer, 2015 High evolutionary turnover of satellite  
757 families in *Caenorhabditis*. BMC Evol. Biol. 15: 218.

758 Thakur J., J. Packiaraj, and S. Henikoff, 2021 Sequence, Chromatin and Evolution of Satellite  
759 DNA. Int. J. Mol. Sci. 22. <https://doi.org/10.3390/ijms22094309>

760 Vieira C. P., A. Almeida, J. D. Dias, and J. Vieira, 2006 On the location of the gene(s) harbouring  
761 the advantageous variant that maintains the X/4 fusion of *Drosophila americana*. Genet.  
762 Res. 87: 163–174.

763 Wei K. H.-C., J. K. Grenier, D. A. Barbash, and A. G. Clark, 2014 Correlated variation and

764 population differentiation in satellite DNA abundance among lines of *Drosophila*  
765 *melanogaster*. Proc. Natl. Acad. Sci. U. S. A. 111: 18793–18798.

766 Wei K. H.-C., S. E. Lower, I. V. Caldas, T. J. S. Sless, D. A. Barbash, *et al.*, 2018 Variable Rates of  
767 Simple Satellite Gains across the *Drosophila* Phylogeny. Mol. Biol. Evol. 35: 925–941.

768 Wei K. H.-C., and D. Bachtrog, Male recombination produced multiple geographically restricted  
769 neo-Y chromosome haplotypes of varying ages that correlate with onset of neo-Y decay in  
770 *Drosophila albomicans*

771
